# Supplementary material for: Structural insights into the modulatory role of the accessory protein WYL1 in the Type VI-D CRISPR-Cas system
Source: PubMed Central journal article supplement (PMC6547453; doi:10.1093/nar/gkz269), 2019-04-12
Supplement: gkz269_supplemental_file.pdf [file gkz269_supplemental_file.pdf]

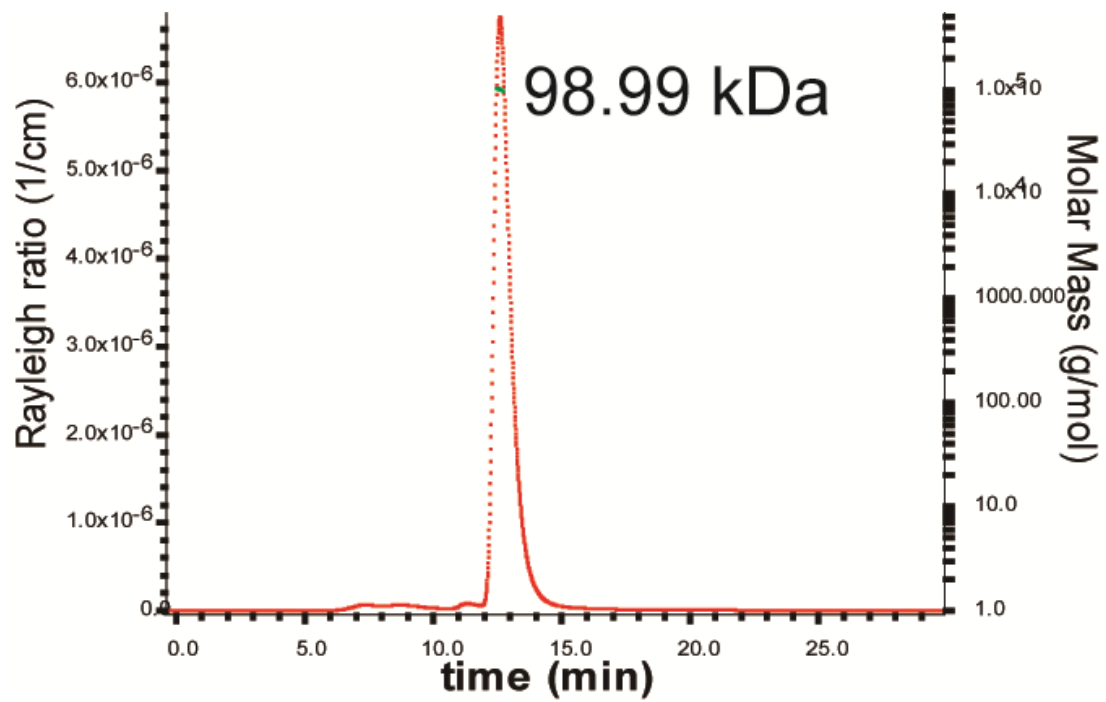

**Fig S1. RspWYL1 behaves as dimer in solution.** The theoretical molecular weight of monomeric RspWYL1 is 45 kDa; The HPLC SEC-MALS analysis on purified RspWYL1 directly demonstrates that RspWYL1 proteins exist as a homogeneous population of homodimers in solution. The hydrodynamic radius of RspWYL1 in solution is 3.899 nm (+/-0.469%).

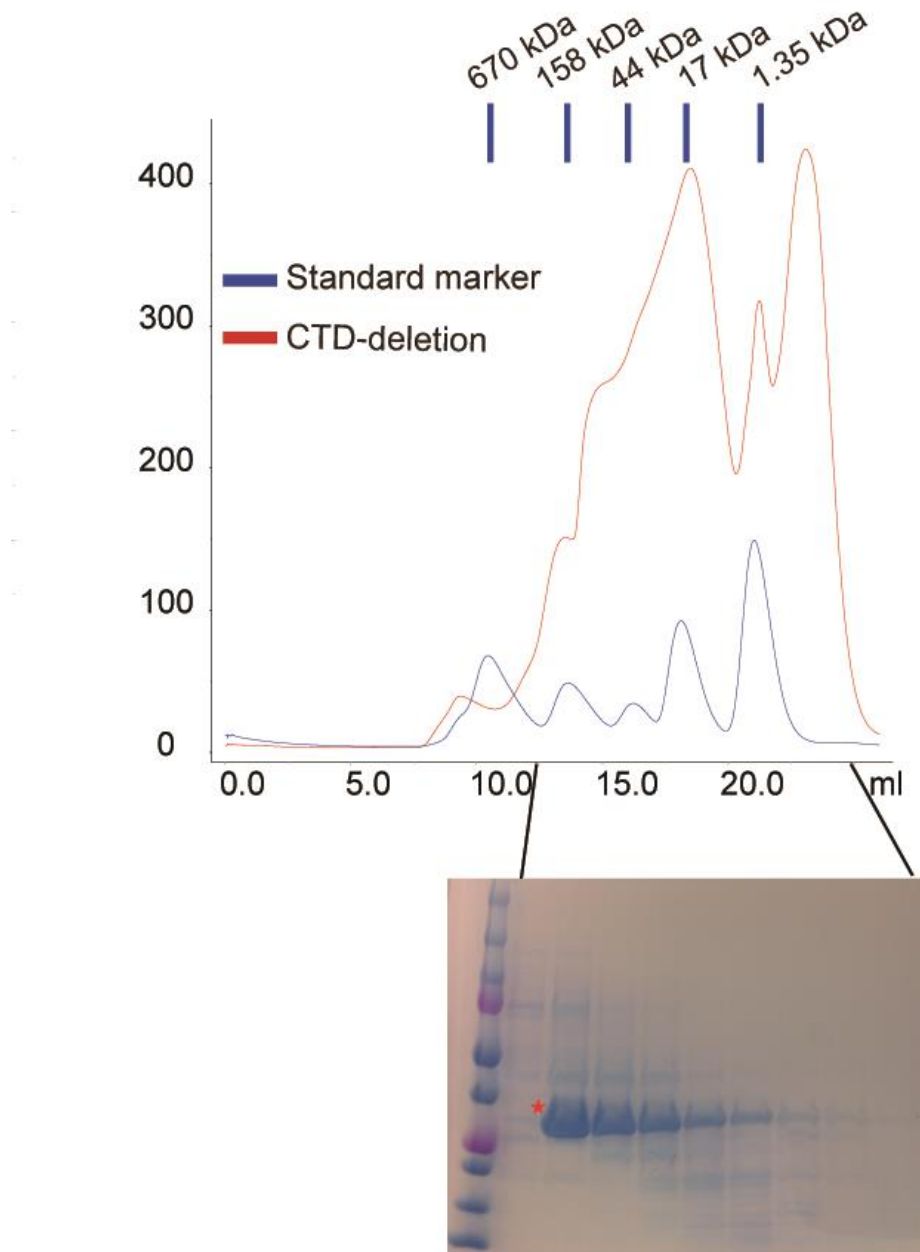

**Fig S2. CTD deletion proteins are not monodisperse in gel-filtration chromatography.** (top panel) Overlaid size-exclusion chromatograms (SEC) of  $\Delta$ CTD RspWYL1 (amino acids 3–301) and protein molecular mass standard. (bottom panel) SDS/PAGE analysis of the SEC elution fractions corresponding to  $\Delta$ CTD. The CTD deletion proteins eluted with a long profile in the gel-filtration, suggesting unstable of the proteins.

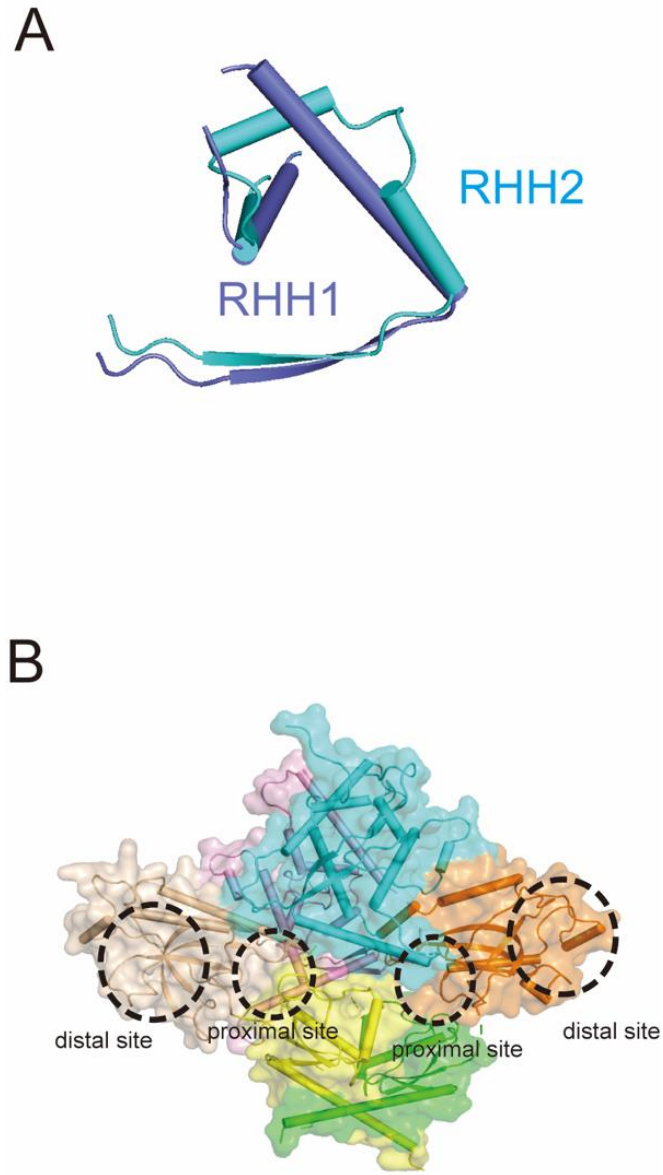

**Fig S3. Structural features of NTC and WYL domains.**

(A) Structural alignments of the two RHH motifs in RspWYL1.

(B) The proximal and distal sites equivalent to Hfq in RspWYL1 are indicated in circles.

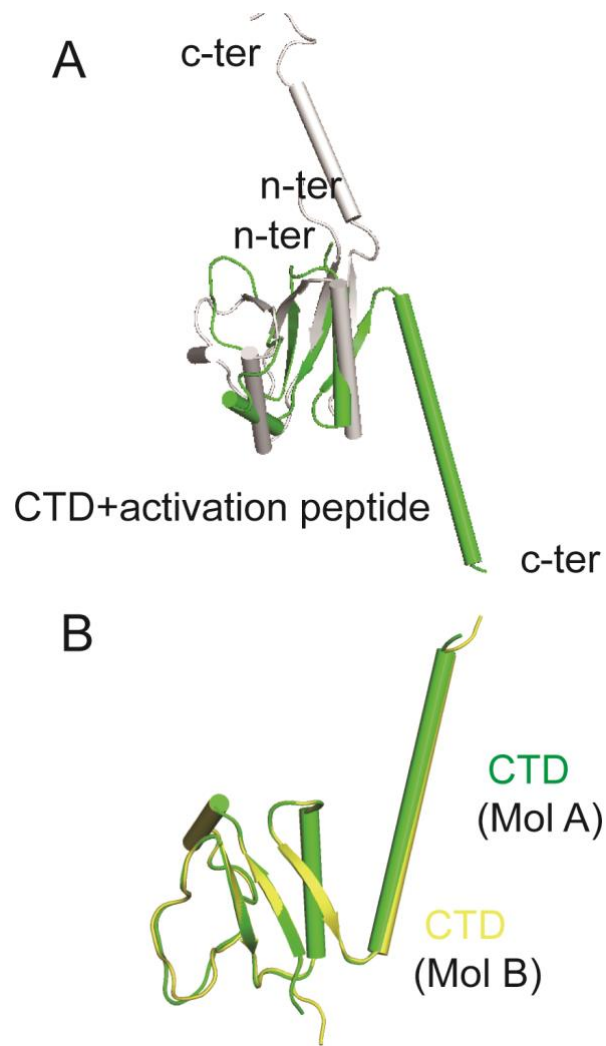

**Fig S4. Structure features of CTD**

(A) Structure superposition of CTD (green) and activation peptide of Thrombin-activatable fibrinolysis (grey, PDB: 5HVG).

(B) Comparison of the CTDs in the two chains.

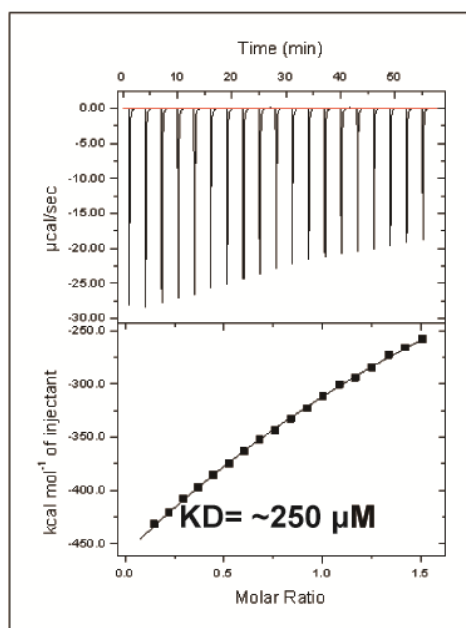

RspWYL1 Titrated into RspCas13d

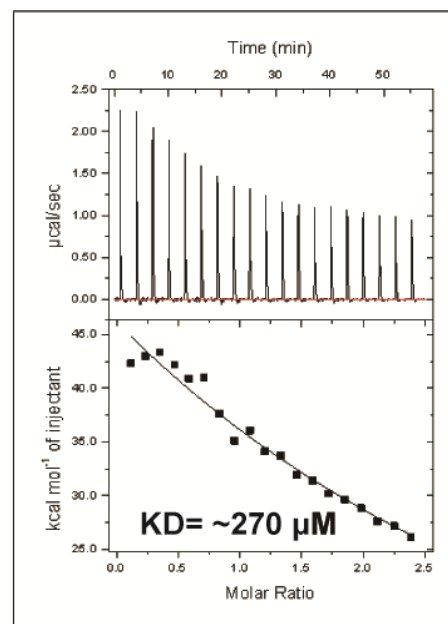

RspWYL1 Titrated into EsCas13d

**Fig S5. Dissociation constants of RspWYL1 with RspCas13d or EsCas13d.** ITC-based measurements quantifying the binding affinities between the RspWYL1 and RspCas13d or EsCas13d.

**Table S1. Thermodynamics of intermolecular binding events of wild-type RspWYL1 or mutants with various nucleic acids or Cas13d orthologues.**

| <b>Intermolecular binding thermodynamics</b>                          | <b>Enthalpy change (<math>\Delta H</math>)</b> | <b>Entropy change (<math>\Delta S</math>)</b> | <b>Exothermic or Endothermic</b> |
|-----------------------------------------------------------------------|------------------------------------------------|-----------------------------------------------|----------------------------------|
| <b>dsDNA titrated into RspWYL1</b>                                    | $\Delta H = 5.277 \times 10^4$<br>cal/mol      | $\Delta S = 191$<br>cal/mol/deg               | Endothermic                      |
| <b>ssDNA titrated into RspWYL1</b>                                    | $\Delta H = 3.636 \times 10^6$<br>cal/mol      | $\Delta S = 1.22 \times 10^4$<br>cal/mol/deg  | Endothermic                      |
| <b>ssRNA titrated into RspWYL1</b>                                    | $\Delta H = 1.30 \times 10^4$<br>cal/mol       | $\Delta S = 65.1$<br>cal/mol/deg              | Endothermic                      |
| <b>ssRNA titrated into <i>RspWYL1<sup>R131D/R133D</sup></i></b>       | ND                                             | ND                                            | ND                               |
| <b>ssRNA titrated into <i>RspWYL1<sup>R219D/R221D</sup></i></b>       | $\Delta H = 3.67 \times 10^8$<br>cal/mol       | $\Delta S = 1.23 \times 10^6$<br>cal/mol/deg  | Endothermic                      |
| <b>ssRNA titrated into <i>RspWYL1<sup>ACTD</sup></i></b>              | ND                                             | ND                                            | ND                               |
| <b>ssRNA titrated into <i>RspWYL1<sup>K273D/K285D/K290D</sup></i></b> | ND                                             | ND                                            | ND                               |
| <b>ssRNA titrated into <i>RspWYL1<sup>K310D/K332D</sup></i></b>       | ND                                             | ND                                            | ND                               |
| <b>RspWYL1 titrated into RspCas13d</b>                                | $\Delta H = -1.70 \times 10^6$<br>cal/mol      | $\Delta S = -5.69 \times 10^3$<br>cal/mol/deg | Exothermic                       |
| <b>RspWYL1 titrated into EsCas13d</b>                                 | $\Delta H = 4.05 \times 10^5$<br>cal/mol       | $\Delta S = 1.38 \times 10^3$<br>cal/mol/deg  | Endothermic                      |

\* ND denotes no significant undetectable binding activity by ITC. 0.5-1mM samples in syringe were injected into 0.05-0.1mM samples in cell chamber of the microcalorimeter at 25 °C.
